# Supplementary material for: A novel scoring system predicts adjuvant chemolipiodolization benefit for hepatocellular carcinoma patients after hepatectomy
Source: PubMed Central journal article supplement (PMC5041920; doi:10.18632/oncotarget.8333), 2016-03-24
Supplement: oncotarget-07-25493-s001.pdf [file oncotarget-07-25493-s001.pdf]

## A novel scoring system predicts adjuvant chemolipiodolization benefit for hepatocellular carcinoma patients after hepatectomy

### Supplementary Materials

**Supplementary Table S1: Univariable analysis of tumor recurrence and OS in the primary cohort**

| Variable                      | Tumor recurrence |                  | OS       |                  |
|-------------------------------|------------------|------------------|----------|------------------|
|                               | <i>P</i>         | HR (95.0%CI)     | <i>P</i> | HR (95.0% CI)    |
| <b>Age, years</b>             |                  |                  |          |                  |
| > 50 vs. ≤ 50                 | 0.50             | 0.95 (0.81–1.11) | 0.09     | 0.84 (0.69–1.03) |
| <b>Gender</b>                 |                  |                  |          |                  |
| Male vs. Female               | 0.13             | 1.21 (0.95–1.55) | 0.40     | 1.14 (0.84–1.57) |
| <b>HBsAg</b>                  |                  |                  |          |                  |
| Positive vs. Negative         | 0.02             | 1.31 (1.04–1.64) | 0.04     | 1.36 (1.02–1.82) |
| <b>HBeAg</b>                  |                  |                  |          |                  |
| Positive vs. Negative         | 0.02             | 1.23 (1.04–1.45) | 0.07     | 1.22 (0.98–1.51) |
| <b>HBcAb</b>                  |                  |                  |          |                  |
| Positive vs. Negative         | 0.10             | 1.29 (0.95–1.76) | 0.23     | 1.26 (0.86–1.86) |
| <b>HCVAb</b>                  |                  |                  |          |                  |
| Positive vs. Negative         | 0.46             | 0.83 (0.51–1.37) | 0.10     | 0.51 (0.23–1.13) |
| <b>Cirrhosis</b>              |                  |                  |          |                  |
| Positive vs. Negative         | 0.78             | 1.02 (0.87–1.20) | 0.93     | 1.01 (0.82–1.24) |
| <b>AFP, ng/mL</b>             |                  |                  |          |                  |
| > 400 vs. ≤ 400               | < 0.001          | 1.39 (1.18–1.64) | 0.02     | 1.30 (1.05–1.60) |
| <b>PT, second</b>             |                  |                  |          |                  |
| > 12 vs. ≤ 12                 | 0.11             | 1.14 (0.97–1.34) | 0.91     | 1.01 (0.83–1.24) |
| <b>PLT, ×10<sup>9</sup>/L</b> |                  |                  |          |                  |
| >100 vs. ≤ 100                | 0.46             | 1.08 (0.89–1.30) | 0.12     | 1.22 (0.95–1.56) |
| <b>ALB, g/L</b>               |                  |                  |          |                  |
| > 40 vs. ≤ 40                 | 0.27             | 0.91 (0.77–1.07) | 0.70     | 1.04 (0.84–1.30) |
| <b>ALT, U/L</b>               |                  |                  |          |                  |
| >40 vs. ≤40                   | 0.004            | 1.26 (1.08–1.48) | 0.32     | 1.11 (0.91–1.36) |
| <b>TBIL, μmol/L</b>           |                  |                  |          |                  |
| ≤ 34 vs. > 34                 | 0.70             | 1.15 (0.57–2.30) | 0.70     | 0.83 (0.31–2.21) |
| <b>WBC, ×10<sup>9</sup>/L</b> |                  |                  |          |                  |
| > 4 vs. ≤ 4                   | 0.26             | 1.12(0.92–1.38)  | 0.10     | 1.25(0.96–1.63)  |
| <b>Tumor number</b>           |                  |                  |          |                  |
| Multiple vs. Single           | < 0.001          | 1.94(1.60–2.35)  | < 0.001  | 2.06 (1.63–2.60) |
| <b>Tumor diameter, cm</b>     |                  |                  |          |                  |
| 3–5 vs. ≤ 3                   | < 0.001          | 1.60 (1.24–2.06) | < 0.001  | 1.96 (1.35–2.85) |
| > 5 vs. 3–5                   | < 0.001          | 2.86 (2.28–3.57) | < 0.001  | 4.50 (3.23–6.26) |
| <b>MVI</b>                    |                  |                  |          |                  |
| Presence vs. Absence          | < 0.001          | 3.12 (2.66–3.66) | < 0.001  | 3.10 (2.53–3.80) |

| Variable                      | Tumor recurrence |                  | OS       |                  |
|-------------------------------|------------------|------------------|----------|------------------|
|                               | <i>P</i>         | HR (95.0%CI)     | <i>P</i> | HR (95.0% CI)    |
| <b>Tumor capsule</b>          |                  |                  |          |                  |
| Incomplete vs. Complete       | < 0.001          | 1.48 (1.26–1.74) | < 0.001  | 2.16 (1.76–2.65) |
| <b>Edmondson–Steiner</b>      |                  |                  |          |                  |
| III/IV vs. I/II               | < 0.001          | 1.43 (1.19–1.72) | < 0.001  | 1.59 (1.25–2.03) |
| <b>Blood transfusion</b>      |                  |                  |          |                  |
| Yes vs. No                    | 0.01             | 1.34 (1.06–1.69) | 0.22     | 1.21 (0.89–1.64) |
| <b>Surgical margin, cm</b>    |                  |                  |          |                  |
| ≤ 1 vs. >1                    | 0.003            | 1.29 (1.09–1.52) | 0.001    | 1.46 (1.17–1.81) |
| <b>Hepatectomy</b>            |                  |                  |          |                  |
| Anatomical vs. Non-anatomical | 0.98             | 1.00 (0.85–1.18) | 0.65     | 1.05 (0.85–1.29) |
| <b>ACL</b>                    |                  |                  |          |                  |
| ACL vs. non-ACL               | 0.52             | 0.95 (0.80–1.12) | 0.76     | 0.97 (0.78–1.20) |

**Supplementary Table S2: Clinicopathologic characteristics of patients treated with or without ACL with a score of  $\geq 10$**

| Variable          | Primary cohort              |                         | <i>P</i> value | Validation cohort           |                         | <i>P</i> value |
|-------------------|-----------------------------|-------------------------|----------------|-----------------------------|-------------------------|----------------|
|                   | Non-ACL<br>( <i>n</i> = 71) | ACL<br>( <i>n</i> = 36) |                | Non-ACL<br>( <i>n</i> = 24) | ACL<br>( <i>n</i> = 17) |                |
| <b>Age, years</b> |                             |                         |                |                             |                         |                |
| ≤ 50              | 32 (45.1%)                  | 26 (72.2%)              | 0.008**        | 15 (62.5%)                  | 8 (47.1%)               | 0.33           |
| > 50              | 39 (54.9%)                  | 10 (27.8%)              |                | 9 (37.5%)                   | 9 (52.9%)               |                |
| <b>Gender</b>     |                             |                         |                |                             |                         |                |
| Male              | 64 (90.1%)                  | 31 (86.1%)              | 0.53           | 19 (79.2%)                  | 14 (82.4%)              | 0.99*          |
| Female            | 7 (9.9%)                    | 5 (13.9%)               |                | 5 (20.8%)                   | 3 (17.6%)               |                |
| <b>HBsAg</b>      |                             |                         |                |                             |                         |                |
| Positive          | 62 (87.3%)                  | 30 (83.3%)              | 0.57           | 20 (83.3%)                  | 12 (70.6%)              | 0.56*          |
| Negative          | 9 (12.7%)                   | 6 (16.7%)               |                | 4 (16.7%)                   | 5 (29.4%)               |                |
| <b>HBeAg</b>      |                             |                         |                |                             |                         |                |
| Positive          | 20 (28.2%)                  | 10 (27.8%)              | 0.97           | 6 (25.0%)                   | 2 (11.8%)               | 0.51*          |
| Negative          | 51 (71.8%)                  | 26 (72.2%)              |                | 18 (75.0%)                  | 15 (88.2%)              |                |
| <b>HBeAb</b>      |                             |                         |                |                             |                         |                |
| Positive          | 66 (93.0%)                  | 34 (94.4%)              | 0.99*          | 24 (100.0%)                 | 17 (100.0%)             | 0.99*          |
| Negative          | 5 (7.0%)                    | 2 (5.6%)                |                | 0 (0.0%)                    | 0 (0.0%)                |                |
| <b>HCVAb</b>      |                             |                         |                |                             |                         |                |
| Positive          | 0 (0%)                      | 1 (2.8%)                | 0.73*          | 1 (4.2%)                    | 1 (5.9%)                | 0.99*          |
| Negative          | 71 (100.0%)                 | 35 (97.2%)              |                | 23 (95.8%)                  | 16 (94.1%)              |                |
| <b>Cirrhosis</b>  |                             |                         |                |                             |                         |                |
| Yes               | 40 (56.3%)                  | 16 (44.4%)              | 0.24           | 11 (45.8%)                  | 8 (47.1%)               | 0.94           |
| No                | 31 (43.7%)                  | 20 (55.6%)              |                | 13 (54.2%)                  | 9 (52.9%)               |                |
| <b>AFP, ng/mL</b> |                             |                         |                |                             |                         |                |
| ≤ 400             | 30 (42.3%)                  | 19 (52.8%)              | 0.30           | 10 (41.7%)                  | 11 (64.7%)              | 0.15           |
| > 400             | 41 (57.7%)                  | 17 (47.2%)              |                | 14 (58.3%)                  | 6 (35.3%)               |                |
| <b>PT, second</b> |                             |                         |                |                             |                         |                |
| ≤ 12              | 34 (47.9%)                  | 19 (52.8%)              | 0.63           | 11 (45.8%)                  | 7 (41.2%)               | 0.77           |
| > 12              | 37 (52.1%)                  | 17 (47.2%)              |                | 13 (54.2%)                  | 10 (58.8%)              |                |

| Variable                      | Primary cohort |             | P value | Validation cohort |             | P value |
|-------------------------------|----------------|-------------|---------|-------------------|-------------|---------|
|                               | Non-ACL        | ACL         |         | Non-ACL           | ACL         |         |
|                               | (n = 71)       | (n = 36)    |         | (n = 24)          | (n = 17)    |         |
| <b>PLT, ×10<sup>9</sup>/L</b> |                |             |         |                   |             |         |
| ≤ 100                         | 11 (15.5%)     | 4 (11.1%)   | 0.54    | 1 (4.2%)          | 4 (23.5%)   | 0.17*   |
| > 100                         | 60 (84.5%)     | 32 (88.9%)  |         | 23 (95.8%)        | 13 (76.5%)  |         |
| <b>ALB, g/L</b>               |                |             |         |                   |             |         |
| ≤ 40                          | 33 (46.5%)     | 10 (27.8%)  | 0.06    | 7 (29.2%)         | 7 (41.2%)   | 0.42    |
| > 40                          | 38 (53.5%)     | 26 (72.2%)  |         | 17 (70.8%)        | 10 (58.8%)  |         |
| <b>ALT, U/L</b>               |                |             |         |                   |             |         |
| ≤ 40                          | 36 (50.7%)     | 11 (30.6%)  | 0.05    | 14 (58.3%)        | 6 (35.3%)   | 0.15    |
| > 40                          | 35 (49.3%)     | 25 (69.4%)  |         | 10 (41.7%)        | 11 (64.7%)  |         |
| <b>TBIL, μmol/L</b>           |                |             |         |                   |             |         |
| ≤ 34                          | 2 (2.8%)       | 0 (0.0%)    | 0.79*   | 0 (0.0%)          | 0 (0.0%)    | 0.99*   |
| > 34                          | 69 (97.2%)     | 36 (100.0%) |         | 24 (100%)         | 17 (100%)   |         |
| <b>WBC, ×10<sup>9</sup>/L</b> |                |             |         |                   |             |         |
| ≤ 4                           | 10 (14.1%)     | 3 (8.3%)    | 0.58*   | 4 (16.7%)         | 5 (29.4%)   | 0.56*   |
| > 4                           | 61 (85.9%)     | 33 (91.7%)  |         | 20 (83.3%)        | 12 (70.6%)  |         |
| <b>Tumor number</b>           |                |             |         |                   |             |         |
| Single                        | 30 (42.3%)     | 22 (61.1%)  | 0.07    | 15 (62.5%)        | 15 (88.2%)  | 0.14*   |
| Multiple                      | 41 (57.7%)     | 14 (38.9%)  |         | 9 (37.5%)         | 2 (11.8%)   |         |
| <b>Tumor diameter, cm</b>     |                |             |         |                   |             |         |
| ≤ 3                           | 0 (0.0%)       | 0 (0.0%)    | 0.99*   | 0 (0.0%)          | 0 (0.0%)    | 0.99*   |
| 3–5                           | 0 (0.0%)       | 0 (0.0%)    |         | 0 (0.0%)          | 0 (0.0%)    |         |
| > 5                           | 71 (100.0%)    | 36 (100.0%) |         | 24 (100.0%)       | 17 (100.0%) |         |
| <b>MVI</b>                    |                |             |         |                   |             |         |
| Presence                      | 71 (100.0%)    | 36 (100.0%) | 0.99*   | 24 (100.0%)       | 17 (100.0%) | 0.99*   |
| Absence                       | 0 (0.0%)       | 0 (0.0%)    |         | 0 (0.0%)          | 0 (0.0%)    |         |
| <b>Tumor capsule</b>          |                |             |         |                   |             |         |
| Complete                      | 0 (0.0%)       | 0 (0.0%)    | 0.99*   | 0 (0.0%)          | 0 (0.0%)    | 0.99*   |
| Incomplete                    | 71 (100.0%)    | 36 (100.0%) |         | 24 (100.0%)       | 17 (100.0%) |         |
| <b>Edmondson–Steiner</b>      |                |             |         |                   |             |         |
| I/II                          | 8 (11.3%)      | 3 (8.3%)    | 0.89*   | 4 (16.7%)         | 1 (5.9%)    | 0.58*   |
| III/IV                        | 63 (88.7%)     | 33 (91.7%)  |         | 20 (83.3%)        | 16 (94.1%)  |         |
| <b>Blood transfusion</b>      |                |             |         |                   |             |         |
| Yes                           | 18 (25.4%)     | 7 (19.4%)   | 0.50    | 3 (12.5%)         | 6 (35.3%)   | 0.18*   |
| No                            | 53 (74.6%)     | 29 (80.6%)  |         | 21 (87.5%)        | 11 (64.7%)  |         |
| <b>Surgical margin, cm</b>    |                |             |         |                   |             |         |
| ≤ 1                           | 70 (98.6%)     | 32 (88.9%)  | 0.08*   | 22 (91.8%)        | 17 (100.0%) | 0.63*   |
| > 1                           | 1 (1.4%)       | 4 (11.1%)   |         | 2 (8.3%)          | 0 (0.0%)    |         |
| <b>Hepatectomy</b>            |                |             |         |                   |             |         |
| Anatomical                    | 48 (67.6%)     | 19 (52.8%)  | 0.13    | 17 (70.8%)        | 12 (70.6%)  | 0.99*   |
| Non-anatomical                | 23 (32.4%)     | 17 (47.2%)  |         | 7 (29.2%)         | 5 (29.4%)   |         |

\*Continuity Correction test.

\*\* The median ages of the non-ACL and ACL groups were 51.0 vs. 47.0 years ( $p=0.06$ ).

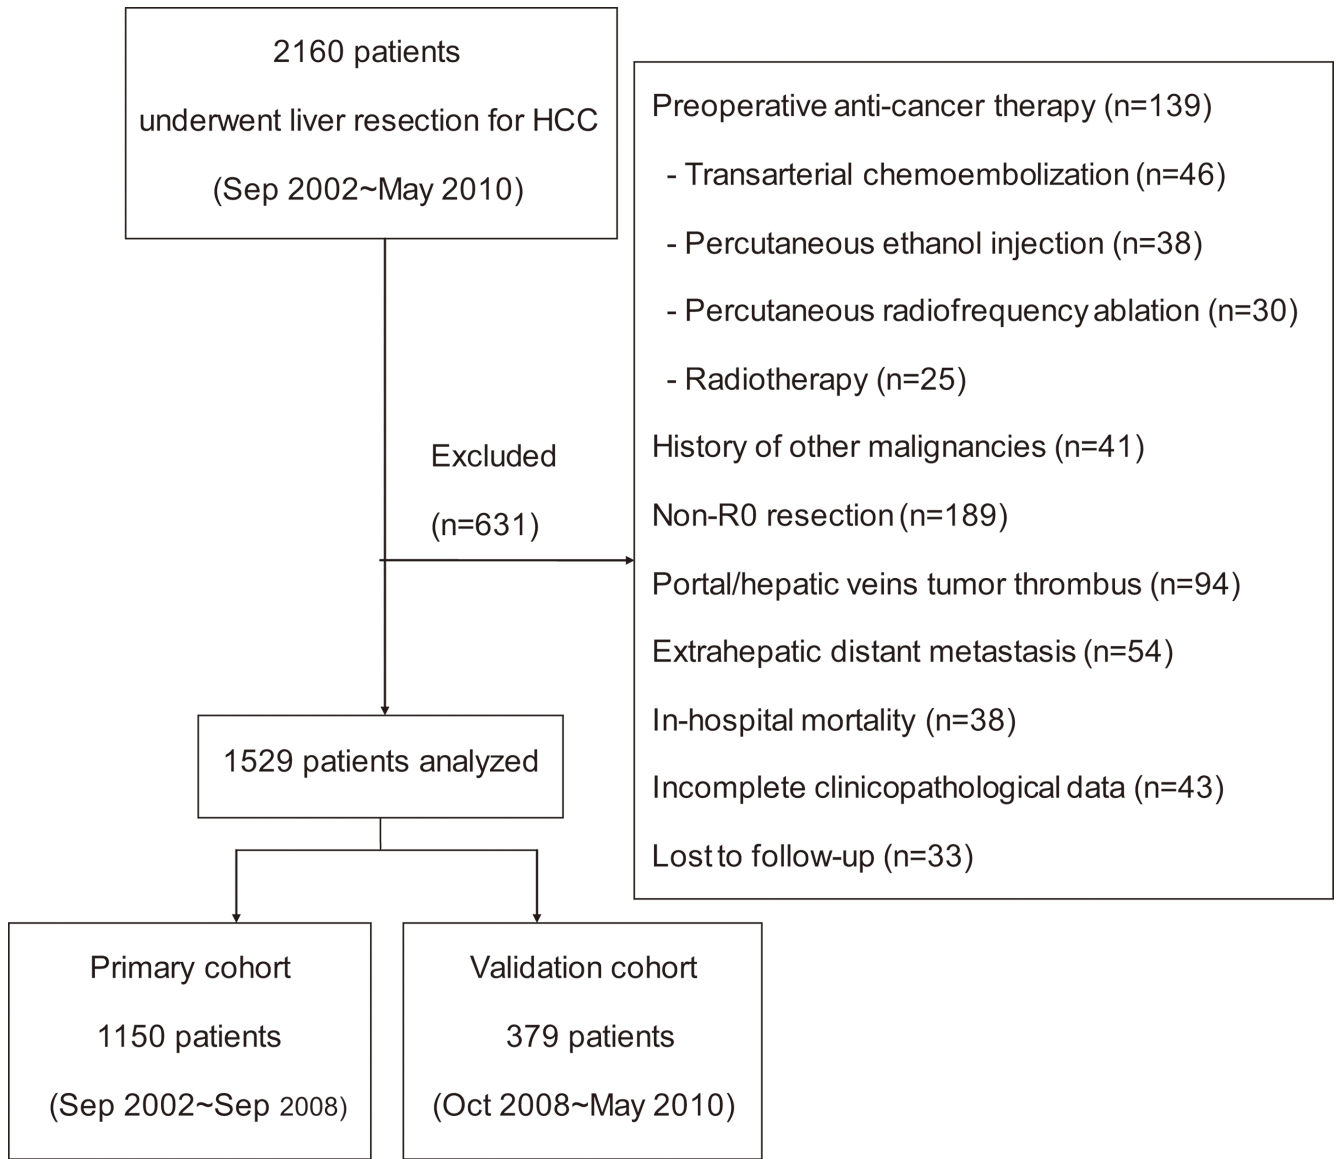

**Supplementary Figure S1: Flow chart of the study.**

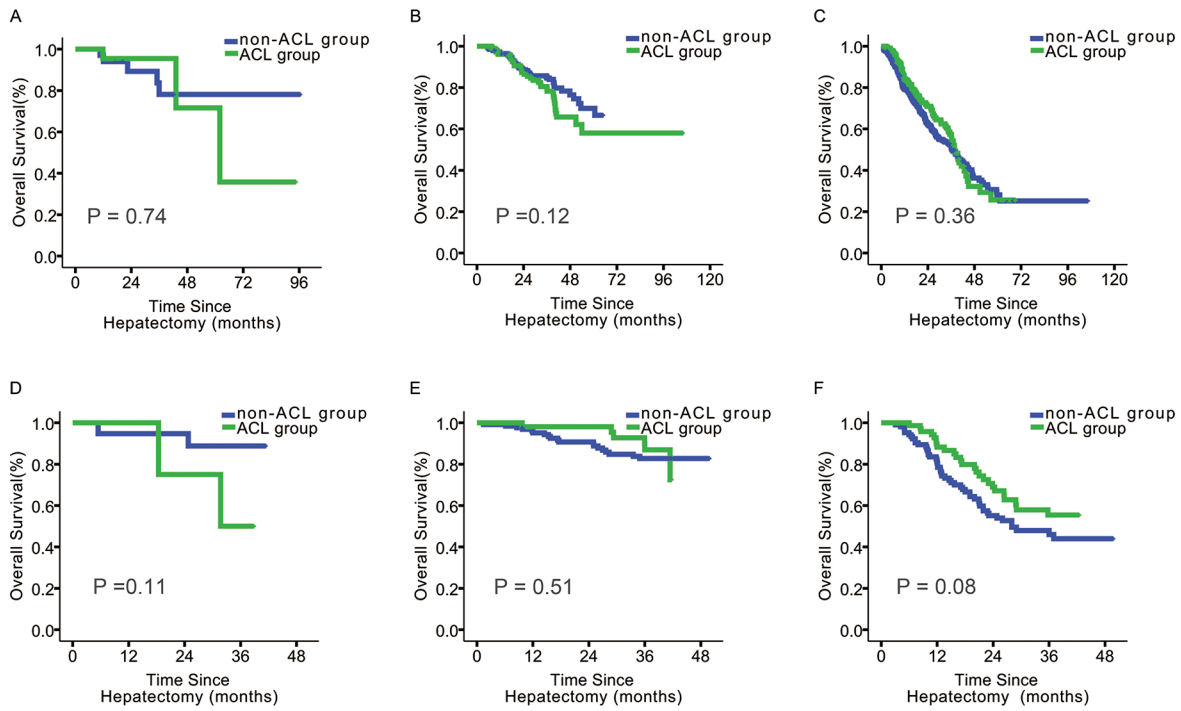

**Supplementary Figure S2: Impact of ACL on OS in patients with HCCs at different BCLC stages.** (A, B, C) OS of patients at stage 0, A and B in the primary cohort respectively; ( $p = 0.74, 0.12$  and  $0.36$ ) (D, E, F) OS of patients at stage 0, A and B in the validation cohort respectively. ( $p = 0.11, 0.51$  and  $0.08$ ).

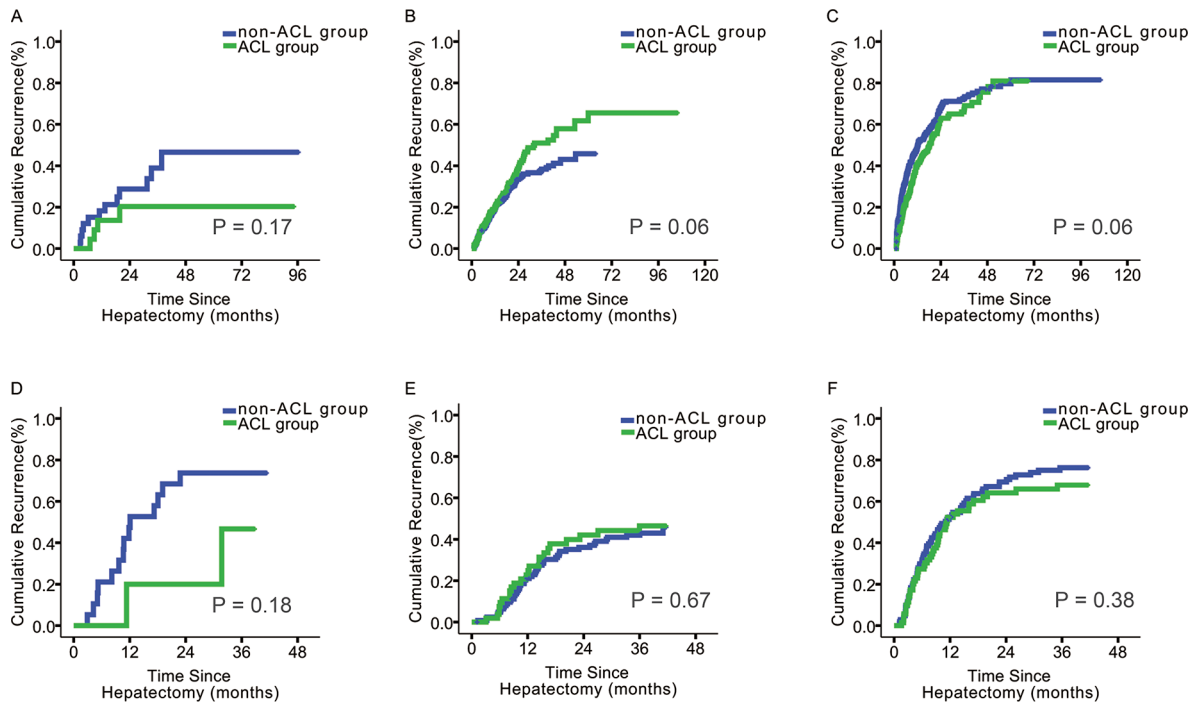

**Supplementary Figure S3: Impact of ACL on tumor recurrence in patients with HCCs at different BCLC stages.** (A, B, C) Tumor recurrence of patients at stage 0, A and B in the primary cohort respectively; ( $p = 0.17, 0.06$  and  $0.06$ ) (D, E, F) Tumor recurrence of patients at stage 0, A and B in the validation cohort respectively. ( $p = 0.18, 0.67$  and  $0.38$ ).

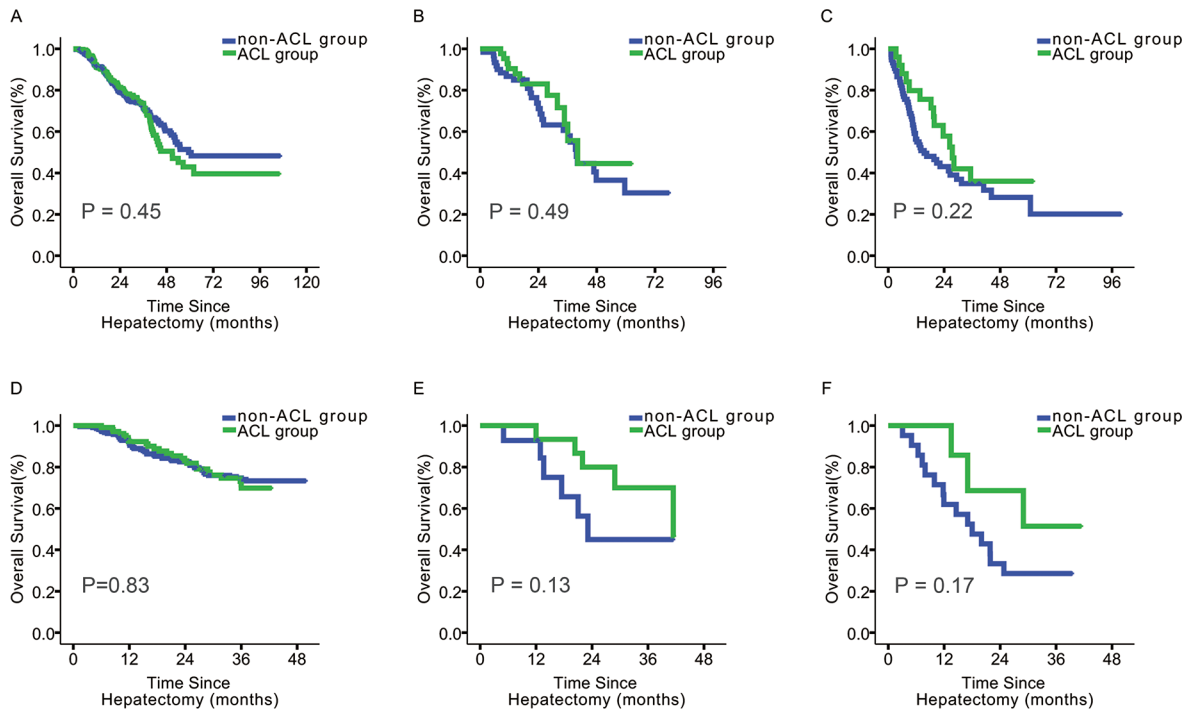

**Supplementary Figure S4: Impact of ACL on OS in patients with HCCs at different 7th TNM stages.** (A, B, C) OS of patients at stage I, II and III in the primary cohort respectively; ( $p = 0.45, 0.49$  and  $0.22$ ) (D, E, F) OS of patients at stage I, II and III in the validation cohort respectively. ( $p = 0.83, 0.13$  and  $0.17$ ).

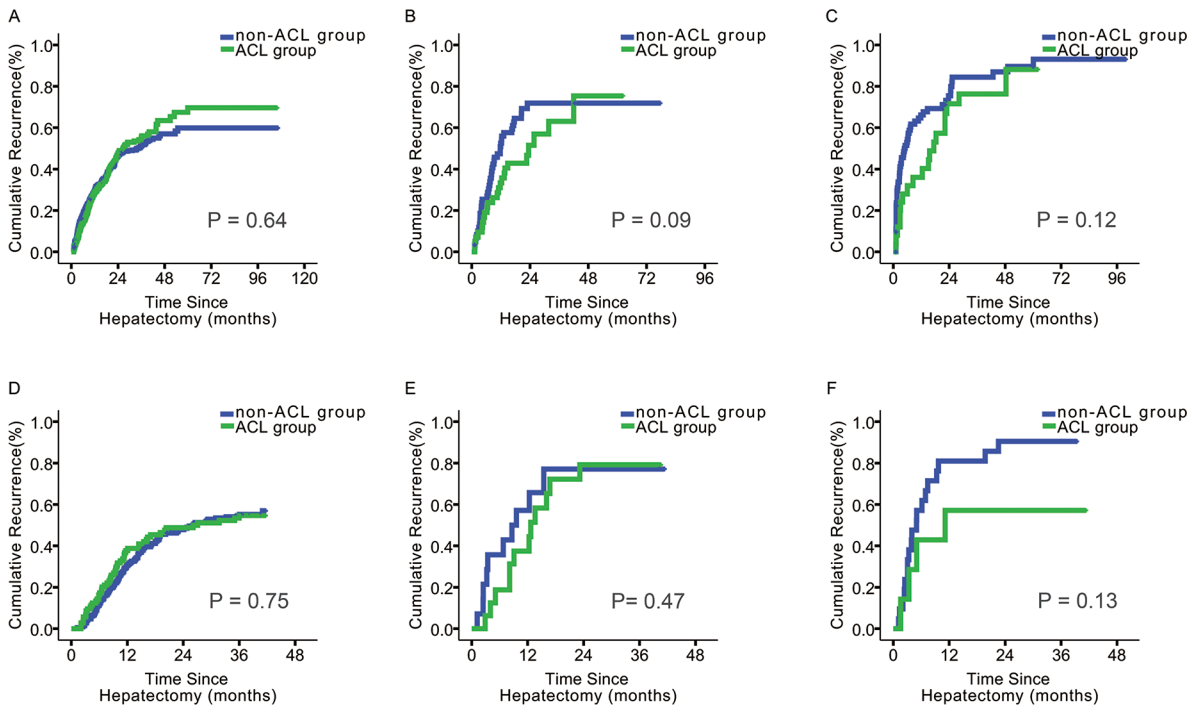

**Supplementary Figure S5: Impact of ACL on tumor recurrence in patients with HCCs at different 7th TNM stages.** (A, B, C) Tumor recurrence of patients at stage I, II and III in the primary cohort respectively; ( $p = 0.64, 0.09$  and  $0.12$ ) (D, E, F) Tumor recurrence of patients at stage I, II and III in the validation cohort respectively. ( $p = 0.75, 0.47$  and  $0.13$ ).
